# Supplementary material for: Development and Characterization of Innovative Multidrug Nanoformulation for Cardiac Therapy
Source: MDPI journal article supplement (doi:10.3390/ma16051812), 2023-02-22
Supplement: s1 [file s1]

# Development and Characterization of Innovative Multidrug Nanoformulation for Cardiac Therapy

Amandine Gendron <sup>1</sup>, Séverine Domenichini <sup>2</sup>, Sandrine Zanna <sup>3</sup>, Frédéric Gobeaux <sup>4</sup>, Christophe Piesse <sup>5</sup>,  
Didier Desmaële <sup>1,\*</sup> and Mariana Varna <sup>1,\*</sup>

Amandine Gendron <sup>1</sup>, Séverine Domenichini <sup>2</sup>, Sandrine Zanna <sup>3</sup>, Frédéric Gobeaux <sup>4</sup>, Christophe Piesse <sup>5</sup>,  
Didier Desmaële <sup>1,\*</sup> and Mariana Varna <sup>1,\*</sup>

<sup>1</sup> Institut Galien Paris-Saclay, CNRS UMR 8612, Université Paris-Saclay, 91400 Orsay, France; amandine.gendron@universite-paris-saclay.fr

<sup>2</sup> UMS-IPSIT Plateforme MIPSIT, Université Paris-Saclay, CNRS, Inserm, Ingénierie et Plateformes au Service de l'Innovation Thérapeutique, 91400 Orsay, France; severine.domenichini@universite-paris-saclay.fr

<sup>3</sup> Research Group Physical Chemistry of Surfaces, Chimie ParisTech-CNRS, Institut de Recherche de Chimie Paris, PSL Research University, 11 Rue Pierre et Marie Curie, 75005 Paris, France; sandrine.zanna@chimieparistech.psl.eu

<sup>4</sup> CEA, CNRS, NIMBE, Université Paris-Saclay, 91191, Gif-sur-Yvette, France; frederic.gobeaux@cea.fr

<sup>5</sup> CNRS, Institut de Biologie Paris-Seine (IBPS), Plateforme d'Ingénierie des Protéines—Service de Synthèse Peptidique, Sorbonne Université, 75006 Paris, France; christophe.piesse@sorbonne-universite.fr

\* Correspondence: didier.desmaele@universite-paris-saclay.fr (D.D.);

mariana.varna-pannerec@universite-paris-saclay.fr (M.V.)

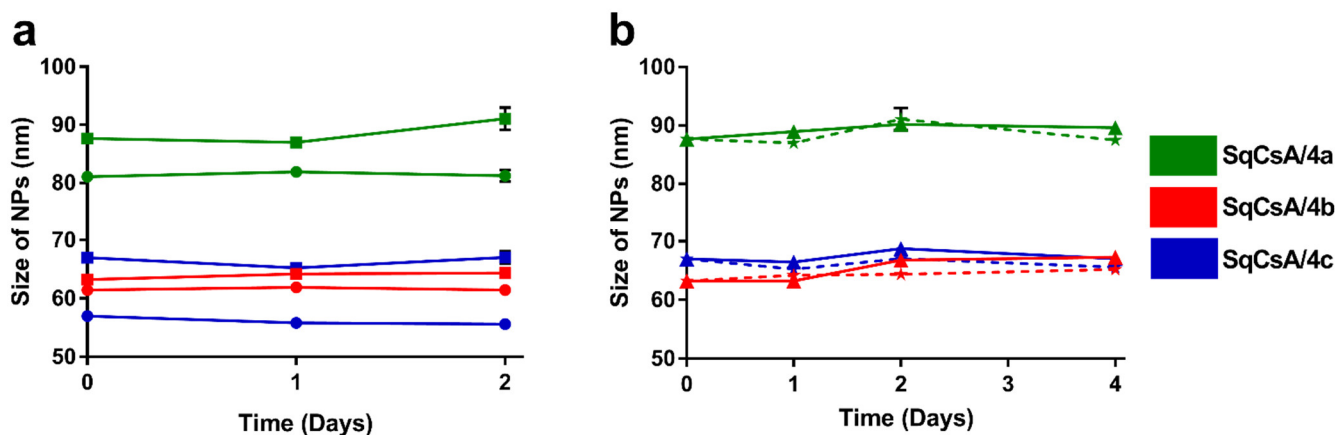

**Figure S1.** Colloidal stability comparing ratio (a) and storage conditions (b). a: Circle and squares correspond respectively to ratio 75:25 and 95:5. b: Triangles and stars correspond respectively to storage of 4 °C and room temperature (RT).

**Table S1.** Experimental (exp) and Theoretical (th) atomic composition of SqCsA, SqCsA/3a 95:5 and 75:25. The atomic composition is represented by a percentage of carbon (C), oxygen (O), nitrogen (N), sulfur (S) and fluorine (F).

| %at.                 | C    | O    | N    | S    | F    | F/C |
|----------------------|------|------|------|------|------|-----|
| SqCsA (exp)          | 76.6 | 12.6 | 10.8 |      |      |     |
| SqCsA (th)           | 77.8 | 12.8 | 9.4  |      |      |     |
| SqCsA/3a 95:5 (exp)  | 76.2 | 13.3 | 10   | 0.05 | 0.45 | 9   |
| SqCsA/3a 95:5 (th)   | 77.2 | 12.9 | 9.4  | 0.04 | 0.38 | 9   |
| SqCsA/3a 75:25 (exp) | 71.4 | 16.6 | 9.5  | 0.26 | 2.2  | 8.5 |
| SqCsA/3a 75:25 (th)  | 75.2 | 13.2 | 9.4  | 0.21 | 1.9  | 9   |

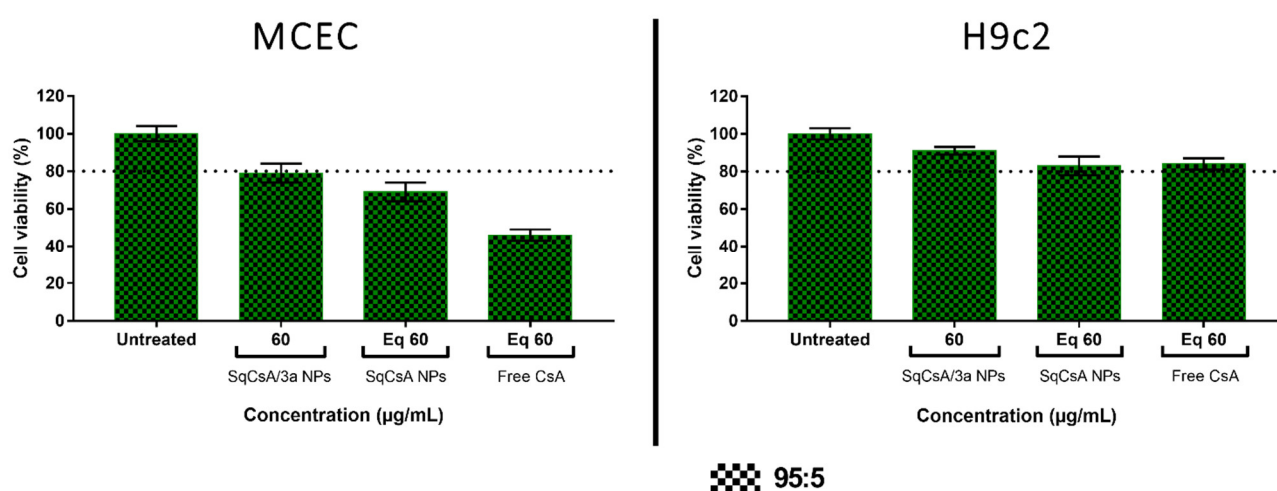

**Figure S2.** Cell viability of SqCsA/3a, SqCsA NPs and free CsA on MCEC and H9c2 cell lines.

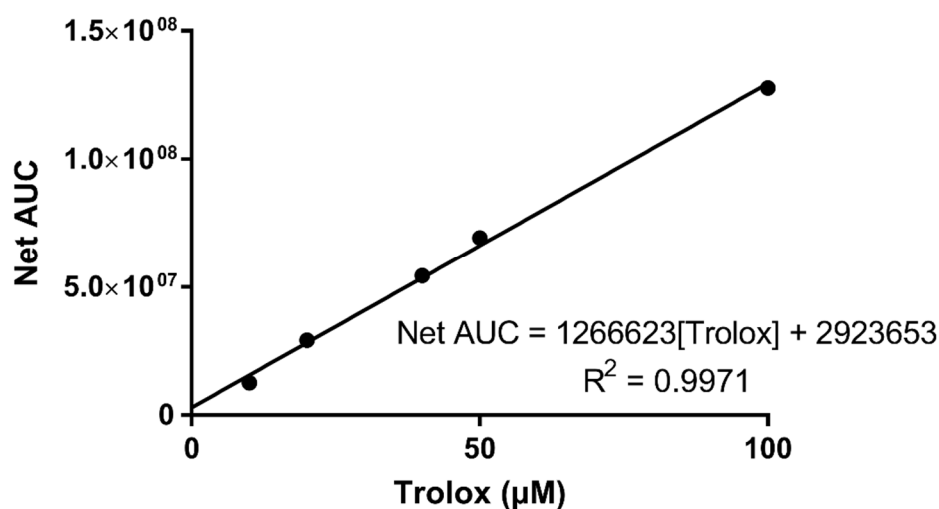

**Figure S3.** Trolox calibration curve and equation.
